**Table 1. Serious Game data.** Main duration time (in minutes) per patients for each task.

| Patients | goToShop | goHome | shopping | cooking | tablePreparation | goOutside |
|----------|----------|--------|----------|---------|------------------|-----------|
| 0        | 3.04     | 2.47   | 0.64     | 9.25    | 1.78             | 0.41      |
| 0        | 4.18     | 2.79   | 0.38     | 2.27    | 3.01             | 0.22      |
| 0        | 3.48     | 2.78   | 0.10     | 3.04    | 1.14             | 0.74      |
| 0        | 3.80     | 4.08   | 0.56     | 2.54    | 1.56             | 0.47      |
| 0        | 3.63     | 5.68   | 0.32     | 3.80    | 1.01             | 0.58      |
| 0        | 2.99     | 3.81   | 0.24     | 3.84    | 5.42             | 0.54      |
| 0        | 4.47     | 2.76   | 0.24     | 2.51    | 2.31             | 0.50      |
| 0        | 4.97     | 3.42   | 0.39     | 3.95    | 1.13             | 0.67      |
| 0        | 3.23     | 2.66   | 0.23     | 2.20    | 2.02             | 0.57      |
| 0        | 4.90     | 3.52   | 0.30     | 1.98    | 1.36             | 0.47      |
| 0        | 3.50     | 2.67   | 0.36     | 4.40    | 1.13             | 0.82      |
| 0        | 5.57     | 3.40   | 0.25     | 3.14    | 1.48             | 0.28      |
| 0        | 3.43     | 2.77   | 0.31     | 5.36    | 2.25             | 0.85      |
| 0        | 2.77     | 2.27   | 0.18     | 1.95    | 0.72             | 0.21      |
| 0        | 5.27     | 12.30  | 0.23     | 2.81    | 4.57             | 0.88      |
| 1        | 4.64     | 3.06   | 1.46     | 5.37    | 2.55             | 0.57      |
| 1        | 5.98     | 6.13   | 1.00     | 5.61    | 2.27             | 0.97      |
| 1        | 5.79     | 8.20   | 1.43     | 3.49    | 1.54             | 0.73      |
| 1        | 8.99     | 5.32   | 0.95     | 5.40    | 2.73             | 0.08      |
| 1        | 2.58     | 4.66   | 1.36     | 3.45    | 1.84             | 0.49      |
| 1        | 5.61     | 6.22   | 1.03     | 5.62    | 1.70             | 0.70      |
| 0        | 3.11     | 2.65   | 0.14     | 3.06    | 0.75             | 0.35      |
| 0        | 2.26     | 2.67   | 0.34     | 2.72    | 1.79             | 0.21      |
| 1        | 8.75     | 5.92   | 4.10     | 6.76    | 2.45             | 0.84      |
| 0        | 3.34     | 3.20   | 0.48     | 3.02    | 1.01             | 0.43      |
| 1        | 7.27     | 5.18   | 1.99     | 9.49    | 3.37             | 0.82      |
| 1        | 3.50     | 5.54   | 1.03     | 2.87    | 1.55             | 0.41      |
| 1        | 5.61     | 5.41   | 0.53     | 1.05    | 0.94             | 0.43      |
| 1        | 3.43     | 4.19   | 3.08     | 4.33    | 1.74             | 0.85      |
| 0        | 2.20     | 2.12   | 0.46     | 1.32    | 0.68             | 0.16      |
| 1        | 2.63     | 3.84   | 0.74     | 2.92    | 2.54             | 0.47      |
| 1        | 7.56     | 5.89   | 1.06     | 4.46    | 2.67             | 0.46      |
| 1        | 8.47     | 8.05   | 1.19     | 5.26    | 2.88             | 0.88      |
| 1        | 4.16     | 4.21   | 1.87     | 3.27    | 2.15             | 0.53      |
| 1        | 3.62     | 4.29   | 2.32     | 7.12    | 2.32             | 0.58      |
| 1        | 4.87     | 6.47   | 1.31     | 4.24    | 1.96             | 0.58      |
| 0        | 2.79     | 2.77   | 0.61     | 2.12    | 1.02             | 0.31      |
| 1        | 2.90     | 3.99   | 0.59     | 1.54    | 1.25             | 0.77      |
